# Supplementary material for: Continuous glucose monitoring in pregnant women with type 1 diabetes: an observational cohort study of 186 pregnancies
Source: Springer Nature journal article supplement (doi:10.1007/s00125-019-4850-0), 2019-03-23
Supplement: MOESM1 [file 16572020]

## ESM Table 1

Number of women and measurements available in the analysis at each trimester

|                                          | <b>Total,<br/>n</b> | <b>rtCGM,<br/>n</b> | <b>iCGM,<br/>n</b> |
|------------------------------------------|---------------------|---------------------|--------------------|
| <b>All trimesters</b>                    |                     |                     |                    |
| Women included                           | 186                 | 92                  | 94                 |
| Raw data <sup>a</sup><br>2-week episodes | 2,944               | 1,442               | 1,502              |
| 2-week episodes<br>in analysis           | 2,306               | 986 <sup>b</sup>    | 1,320 <sup>b</sup> |
| Measurements<br>in analysis              | 5,745,712           | 3,764,676           | 1,981,036          |
| <b>Trimester 1</b>                       |                     |                     |                    |
| Women                                    | 155                 | 70                  | 85                 |
| 2-week episodes                          | 671                 | 240                 | 431                |
| Measurements                             | 1,571,461           | 919,413             | 652,048            |
| <b>Trimester 2</b>                       |                     |                     |                    |
| Women                                    | 165                 | 77                  | 88                 |
| 2-week episodes                          | 955                 | 423                 | 532                |
| Measurements                             | 2,441,400           | 1,642,134           | 799,266            |
| <b>Trimester 3</b>                       |                     |                     |                    |
| Women                                    | 167                 | 85                  | 82                 |
| 2-week episodes                          | 680                 | 323                 | 357                |
| Measurements                             | 1,732,851           | 1,203,129           | 529,722            |

<sup>a</sup>Including 2-week episodes with  $\leq 80\%$  coverage.

<sup>b</sup>The median (range) number of readings per 2-week episode was 3,862 (3,229–4,546) for women monitored with rtCGM and 1,346 (1,076–2,236) for women monitored with iCGM.

**ESM Table 2** Mean glucose and glucose variability indices for women monitored by rCGM and iCGM during pregnancy

| Gestational age (weeks)        | 1-4       | 5-8       | 9-12      | 13-16     | 17-20     | 21-24     | 25-28     | 29-32     | 33-36     | 37-40     |
|--------------------------------|-----------|-----------|-----------|-----------|-----------|-----------|-----------|-----------|-----------|-----------|
| rCGM (n)                       | 22        | 38        | 59        | 61        | 68        | 68        | 73        | 81        | 66        | 30        |
| iCGM (n)                       | 49        | 69        | 71        | 80        | 80        | 81        | 81        | 78        | 72        | 45        |
| Glucose mmol/l                 |           |           |           |           |           |           |           |           |           |           |
| rCGM                           | 9.1±2.2   | 8.5±1.6   | 7.7±1.4   | 7.4±1.1   | 7.4±1.2   | 7.6±1.4   | 7.5±1.2   | 7.3±1.1   | 7.0±0.9   | 6.6±0.8   |
| iCGM                           | 8.8±1.5   | 8.1±1.6   | 7.2±1.2   | 7.1±1.1   | 7.3±1.2   | 7.3±1.2   | 7.2±1.3   | 7.0±1.2   | 6.7±1.1   | 6.3±0.8   |
| SD mmol/l                      |           |           |           |           |           |           |           |           |           |           |
| rCGM                           | 3.1±0.9   | 3.1±0.9   | 2.9±0.7   | 2.8±0.6   | 2.8±0.6   | 2.8±0.8   | 2.6±0.5   | 2.5±0.5   | 2.3±0.5   | 2.1±0.5   |
| iCGM                           | 3.6±1.0   | 3.3±1.0   | 3.0±0.9   | 2.9±0.8   | 2.8±0.7   | 2.7±0.7   | 2.6±0.6   | 2.4±0.6   | 2.3±0.6   | 2.2±0.6   |
| CV%                            |           |           |           |           |           |           |           |           |           |           |
| rCGM                           | 34.5±8.0  | 36.0±6.8  | 38.0±63.7 | 38.2±6.5  | 37.3±6.4  | 36.3±6.5  | 34.8±5.6  | 34.6±5.4  | 33.5±5.6  | 32.4±5.2  |
| iCGM                           | 40.3±6.6  | 40.1±7.8  | 41.1±8.2  | 40.4±7.4  | 38.9±6.3  | 37.3±6.7  | 36.1±6.6  | 34.5±5.3  | 34.9±5.5  | 35.1±6.2  |
| Time in target, % <sup>a</sup> |           |           |           |           |           |           |           |           |           |           |
| rCGM                           | 39.2±15.2 | 45.8±15.9 | 51.7±11.9 | 54.1±10.9 | 55.1±12.3 | 54.4±14.4 | 55.2±12.1 | 57.2±13.1 | 62.8±12.1 | 70.1±11.1 |
| iCGM                           | 42.3±16.1 | 47.7±16.4 | 54.2±15.7 | 54.7±14.7 | 54.4±14.7 | 55.2±15.1 | 56.5±16.3 | 59.2±15.2 | 63.1±13.7 | 68.6±11.9 |
| Time above target, %           |           |           |           |           |           |           |           |           |           |           |
| rCGM                           | 58.0±16.4 | 50.6±18.0 | 41.9±15.0 | 38.6±13.3 | 38.5±14.7 | 39.8±16.1 | 39.4±14.5 | 37.6±15.3 | 32.3±13.3 | 25.1±12.2 |
| iCGM                           | 52.0±17.4 | 45.3±17.2 | 36.0±15.2 | 35.5±14.2 | 37.1±15.1 | 36.9±15.7 | 35.9±17.4 | 33.8±16.8 | 28.7±15.0 | 22.6±11.9 |
| Time below target, %           |           |           |           |           |           |           |           |           |           |           |
| rCGM                           | 2.8±3.3   | 3.6±4.1   | 6.4±5.6   | 7.2±5.6   | 6.4±5.6   | 5.8±5.6   | 5.5±5.0   | 5.2±5.3   | 4.9±5.4   | 4.8±3.9   |
| iCGM                           | 5.6±4.9   | 7.0±5.3   | 9.8±5.5   | 9.8±5.8   | 8.6±5.5   | 7.8±5.8   | 7.6±5.4   | 7.0±5.4   | 8.2±7.3   | 8.7±5.8   |
| MAGE                           |           |           |           |           |           |           |           |           |           |           |
| rCGM                           | 8.0±2.4   | 7.7±2.1   | 7.4±1.7   | 7.2±1.6   | 7.0±1.5   | 7.0±1.9   | 6.5±1.3   | 6.4±1.2   | 6.0±1.1   | 5.4±1.2   |
| iCGM                           | 8.9±2.5   | 8.1±2.5   | 7.3±2.0   | 7.0±1.7   | 7.0±1.8   | 6.7±1.6   | 6.3±1.5   | 6.0±1.4   | 5.7±1.5   | 5.4±1.4   |
| HbG1                           |           |           |           |           |           |           |           |           |           |           |
| rCGM                           | 8.3±7.3   | 6.6±4.6   | 4.7±3.6   | 4.1±2.5   | 4.1±2.7   | 4.4±3.8   | 3.9±2.9   | 3.6±2.2   | 2.8±1.6   | 2.0±1.3   |
| iCGM                           | 7.9±4.4   | 6.1±4.3   | 4.2±2.9   | 3.9±2.7   | 4.0±2.8   | 3.8±3.1   | 3.6±2.9   | 3.2±2.6   | 2.5±2.1   | 1.9±1.4   |
| LBG1                           |           |           |           |           |           |           |           |           |           |           |
| rCGM                           | 1.1±1.1   | 1.4±1.3   | 2.4±1.7   | 2.6±1.7   | 2.4±1.8   | 2.2±1.6   | 2.1±1.6   | 2.1±1.7   | 2.1±1.7   | 2.3±1.3   |
| iCGM                           | 2.2±1.6   | 2.6±1.7   | 3.6±1.7   | 3.6±1.7   | 3.2±1.7   | 3.0±1.8   | 3.0±1.8   | 2.7±1.7   | 3.3±2.2   | 3.5±1.6   |

Results are given as mean  $\pm$  SD.

<sup>a</sup>Defined as glucose level 3.5–7.8 mmol/L.

**ESM Table 3**

Results of the binary logistic regression analysis of variables tested for associations with the Neonatal Composite Outcome

| Variable                       | NCO<br>(n=76) | No NCO<br>(n=102) | Crude data       |         | Adjusted data    |         |
|--------------------------------|---------------|-------------------|------------------|---------|------------------|---------|
|                                |               |                   | OR<br>(95% CI)   | p value | OR<br>(95% CI)   | p value |
| <b>Trimester 1 (n = 147)</b>   |               |                   |                  |         |                  |         |
| HbA <sub>1c</sub> , mmol/mol   | 55.4±12.0     | 50.0±8.9          | 1.05 (1.02–1.09) | <0.01   | 1.05 (1.02–1.09) | <0.01*  |
| HbA <sub>1c</sub> , %          | 7.2±1.1       | 6.7±0.8           |                  |         |                  |         |
| Mean glucose, mmol/l           | 8.1±1.4       | 7.7±1.3           | 1.28 (1.00-1.64) | 0.05    | 1.29 (1.00-1.69) | <0.05   |
| SD, mmol/l                     | 3.3±0.9       | 3.0±0.8           | 1.52 (1.02-2.26) | 0.04    | 1.42 (0.92-2.18) | 0.11    |
| CV%                            | 41.1±8.0      | 39.6±6.4          | 1.03 (0.98-1.08) | 0.21    | 1.02 (0.97-1.07) | 0.54    |
| Time in target, % <sup>a</sup> | 46.8±14.1     | 52.4±13.9         | 0.97 (0.95-1.00) | 0.02    | 0.97 (0.95-1.00) | 0.04*   |
| Time above target, %           | 46.2±15.3     | 40.9±15.5         | 1.02 (1.00-1.05) | 0.04    | 1.03 (1.00-1.05) | 0.04*   |
| Time below target, %           | 7.0±5.3       | 6.8±4.8           | 1.01 (0.95-1.08) | 0.79    | 0.99 (0.92-1.06) | 0.72    |
| MAGE                           | 7.9±2.2       | 7.4±1.8           | 1.15 (0.97-1.37) | 0.10    | 1.11 (0.92-1.34) | 0.26    |
| HBGI                           | 6.2±4.1       | 4.9±3.3           | 1.10 (1.00-1.21) | 0.05    | 1.10 (0.99-1.21) | 0.60    |
| LBGI                           | 2.6±1.7       | 2.5±1.5           | 1.03 (0.83-1.26) | 0.81    | 0.96 (0.76-1.20) | 0.69    |
| <b>Trimester 2 (n = 157)</b>   |               |                   |                  |         |                  |         |
| HbA <sub>1c</sub> , mmol/mol   | 47.5±8.1      | 43.6±7.5          | 1.07 (1.02–1.11) | <0.01   | 1.06 (1.02–1.11) | <0.01*  |
| HbA <sub>1c</sub> , %          | 6.5±0.7       | 6.1±0.7           |                  |         |                  |         |
| Mean glucose, mmol/l           | 7.6±0.9       | 7.1±1.3           | 1.43 (1.06-1.93) | 0.01    | 1.48 (1.08-2.03) | 0.01*   |
| SD, mmol/l                     | 2.8±0.6       | 2.7±0.6           | 1.49 (0.89-2.48) | 0.12    | 1.43 (0.83-2.46) | 0.20    |
| CV%                            | 37.3±6.7      | 37.6±5.6          | 0.99 (0.94-1.05) | 0.77    | 0.98 (0.93-1.04) | 0.49    |
| Time in target, % <sup>a</sup> | 51.9±12.6     | 57.3±13.9         | 0.97 (0.95-0.99) | 0.01    | 0.97 (0.95-0.99) | 0.02*   |
| Time above target, %           | 41.9±12.8     | 35.0±15.5         | 1.03 (1.01-1.06) | <0.01   | 1.04 (1.01-1.06) | <0.01*  |
| Time below target, %           | 6.2±4.7       | 7.7±5.2           | 0.94 (0.88-1.01) | 0.06    | 0.91 (0.84-0.98) | 0.01*   |
| MAGE                           | 6.8±1.4       | 6.6±1.5           | 1.09 (0.97-1.35) | 0.45    | 1.06 (0.84-1.33) | 0.65    |
| HBGI                           | 4.4±2.3       | 3.6±3.0           | 1.10 (0.98-1.24) | 0.10    | 1.10 (0.97-1.25) | 0.12    |
| LBGI                           | 2.3±1.4       | 2.9±1.7           | 0.79 (0.64-0.98) | 0.03    | 0.70 (0.55-0.90) | <0.01   |
| <b>Trimester 3 (n = 161)</b>   |               |                   |                  |         |                  |         |
| HbA <sub>1c</sub> , mmol/mol   | 48.5±7.3      | 43.9±7.2          | 1.09 (1.04-1.15) | <0.001  | 1.09 (1.04-1.14) | <0.00*  |
| HbA <sub>1c</sub> , %          | 6.6±0.7       | 6.1±0.7           |                  |         |                  |         |
| Mean glucose, mmol/l           | 7.3±0.8       | 6.9±1.3           | 1.49 (1.08-2.05) | <0.01   | 1.49 (1.06-2.08) | 0.01*   |
| SD, mmol/l                     | 2.7±0.6       | 2.4±0.6           | 2.01 (1.13-3.58) | 0.02    | 1.94 (1.06-3.55) | 0.03*   |
| CV%                            | 36.3±6.3      | 35.5±5.3          | 1.03 (0.97-1.08) | 0.39    | 1.02 (0.96-1.08) | 0.51    |
| Time in target, % <sup>a</sup> | 56.4±11.0     | 62.5±14.1         | 0.96 (0.94-0.99) | <0.01   | 0.97 (0.94-0.99) | 0.01*   |
| Time above target, %           | 37.9±11.2     | 30.4±16.2         | 1.04 (1.01-1.06) | <0.001  | 1.04 (1.01-1.06) | <0.01*  |
| Time below target, %           | 5.7±4.8       | 7.0±6.0           | 0.96 (0.90-1.02) | 0.13    | 0.94 (0.87-1.00) | <0.05*  |
| MAGE                           | 6.3±1.3       | 6.0±1.5           | 1.22 (0.96-1.53) | 0.09    | 1.20 (0.94-1.53) | 0.14    |
| HBGI                           | 3.6±1.7       | 3.0±2.9           | 1.11 (0.97-1.28) | 0.11    | 1.09 (0.95-1.26) | 0.19    |
| LBGI                           | 2.2±1.4       | 2.8±1.9           | 0.80 (0.65-0.98) | 0.03    | 0.74 (0.58-0.94) | <0.01*  |

Neonatal composite including ≥ 1 of the following: macrosomia (> 4,500 g), shoulder dystocia, neonatal hypoglycemia, or NICU admission > 24 hours.

Results are given as mean ± SD

<sup>a</sup>Defined as glucose level 3.5–7.8 mmol/l

\*A significant association ( $p<0.05$ ) in a hierarchical binary logistic regression analysis with adjustment for age, smoking, BMI and CGM device.
